# Supplementary material
Source: PubMed Central journal article supplement (PMC5012509)

# Supplementary Figure 1

A

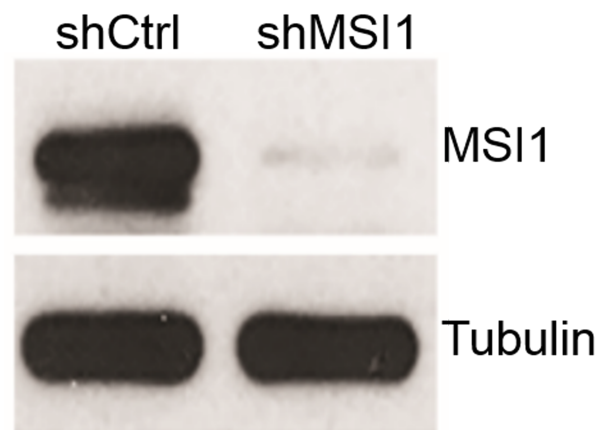

B

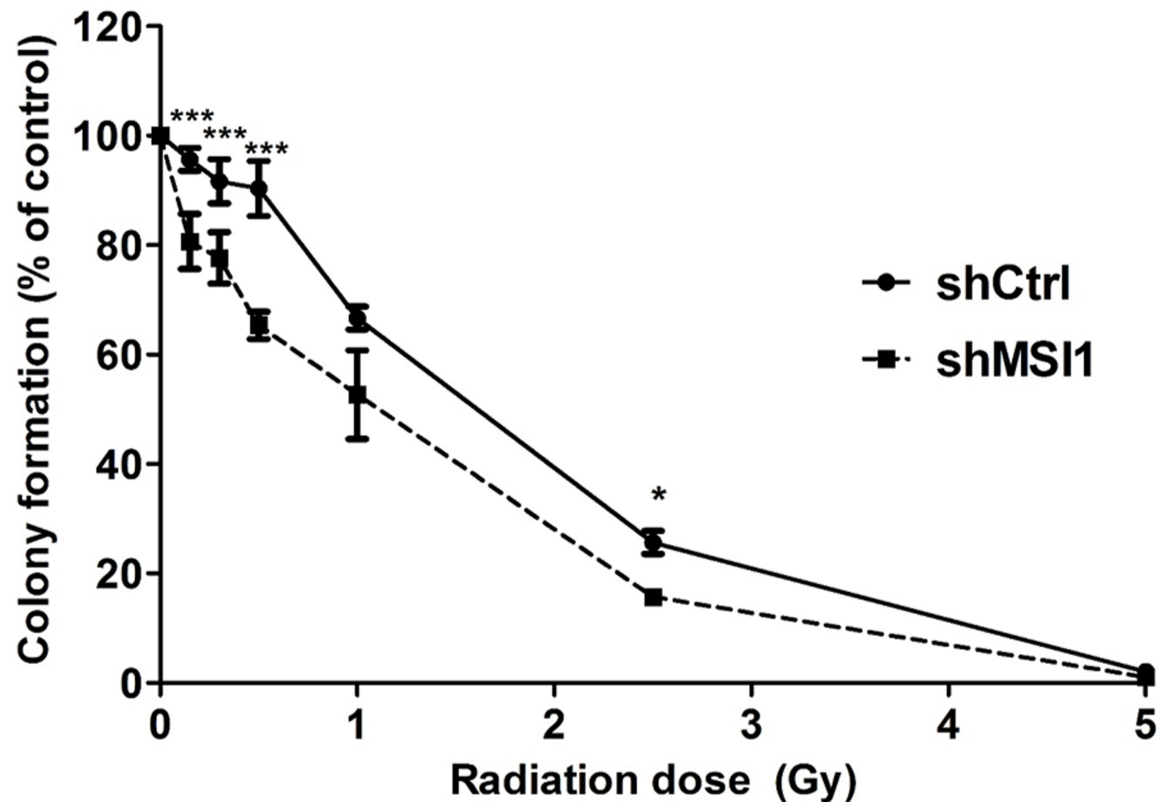

Supplement: mmc1.pdf [file mmc1.pdf]

# Supplementary Figure 2

## A

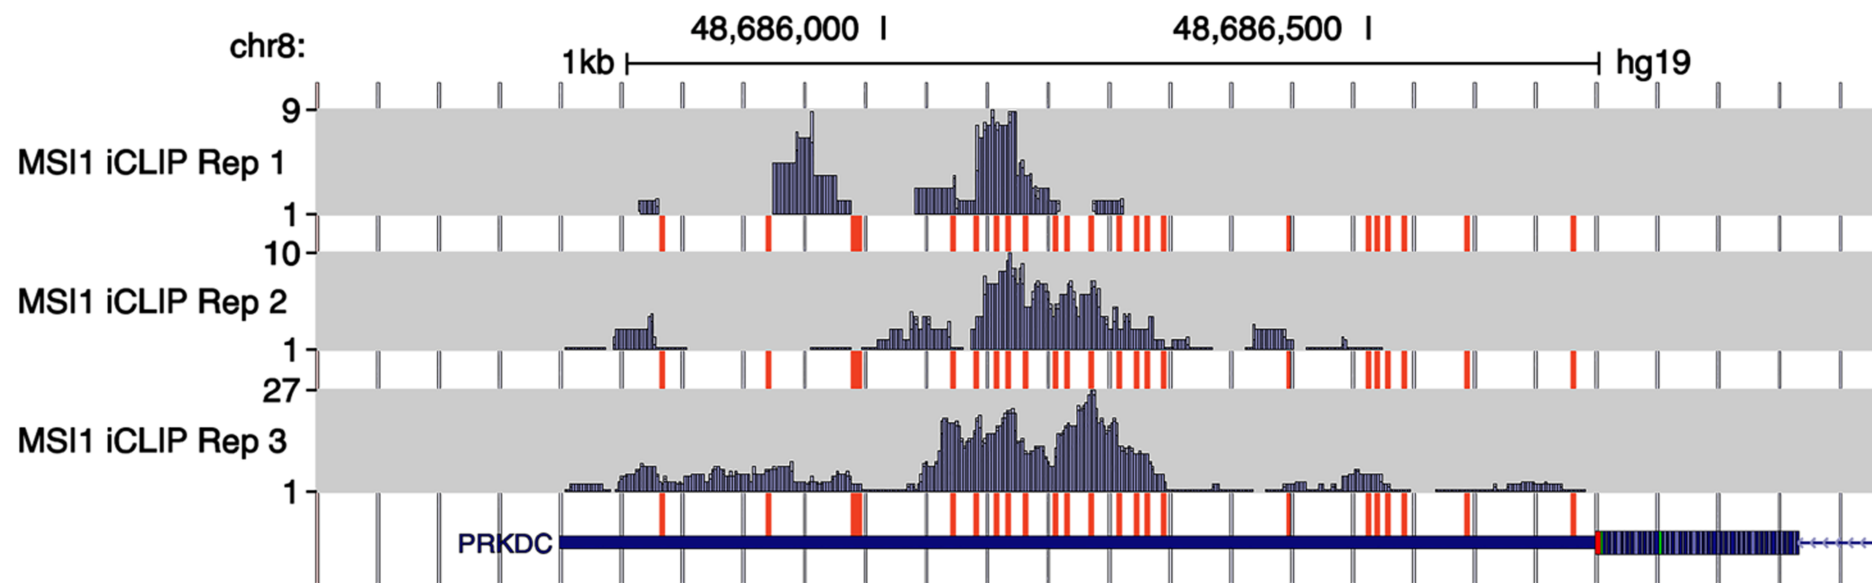

## B

Time after radiation (hour)

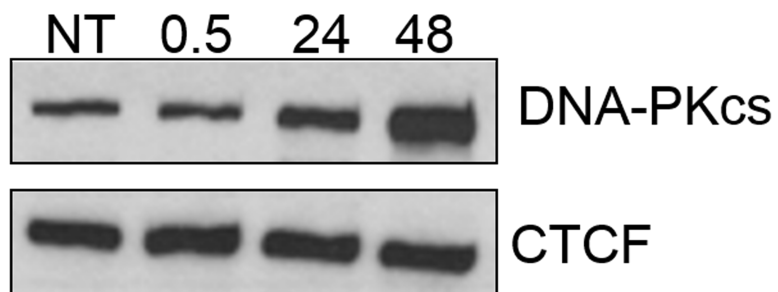

Supplement: mmc2.pdf [file mmc2.pdf]
